# Supplementary material for: One-step synthesis of carboxyl-functionalized rare-earth fluoride nanoparticles for cell imaging and drug delivery
Source: Royal Society of Chemistry journal article supplement (doi:10.1039/c5ra02217g), 2015-01-01
Supplement: c5ra02217g1.pdf [file c5ra02217g1.pdf]

# One-step synthesis of carboxyl-functionalized rare-earth fluorides nanoparticles for cell imaging and drug delivery

Zhiyang Zhang<sup>1</sup>, Xiaoyan Ma<sup>1</sup>, Zhirong Geng<sup>1</sup>, Kuaibing Wang<sup>1,2</sup>, Zhilin Wang<sup>1</sup>

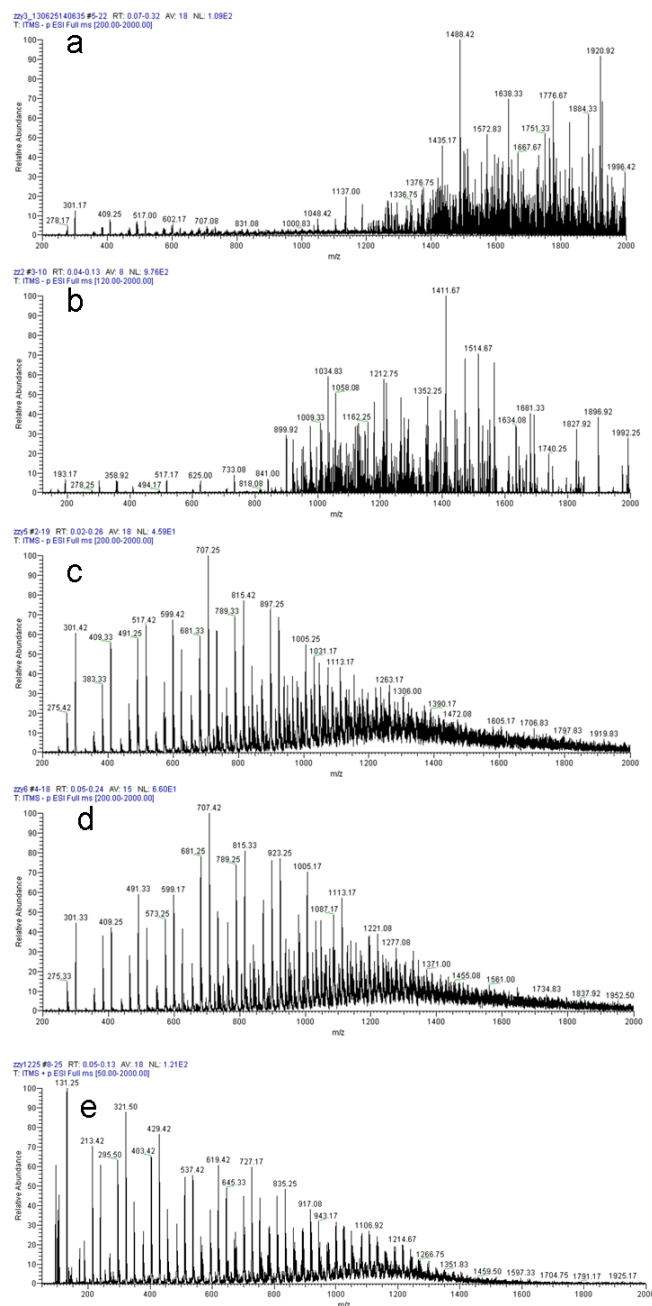

Fig. S1 ESI-MS of solute in supernate from production prepared with different amounts of NaOH (a) 0 mg, (b) 240 mg, (c) 480 mg, (d) 720 mg and (e) 960 mg.

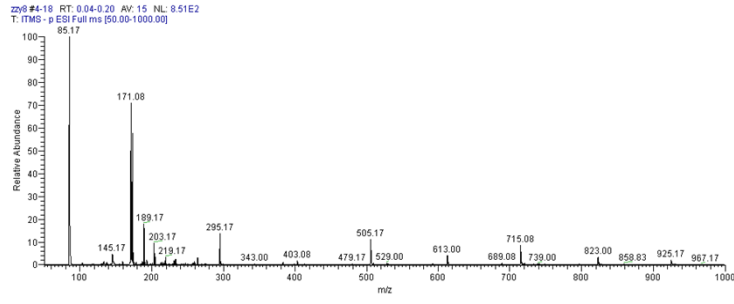

Fig. S2 ESI-MS of MAA monomer.

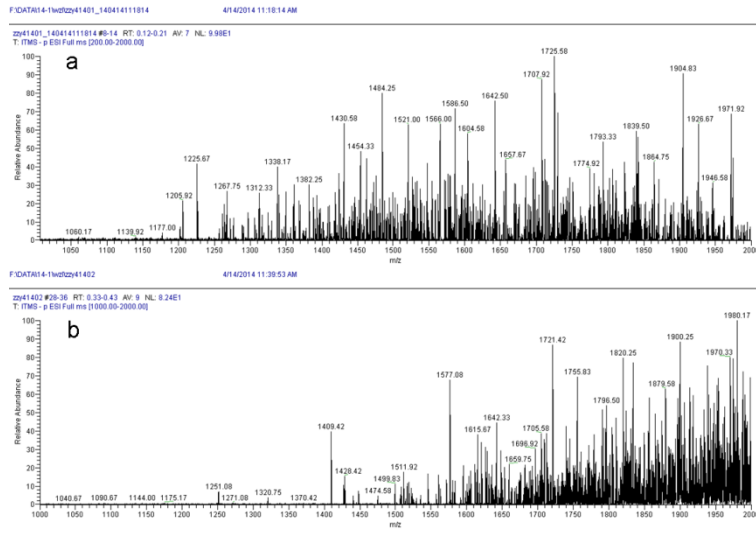

Fig. S3 ESI-MS of solute in supernate from production prepared with 0 mg NaOH (a) without rare-earth ions, (b) with rare-earth ions.

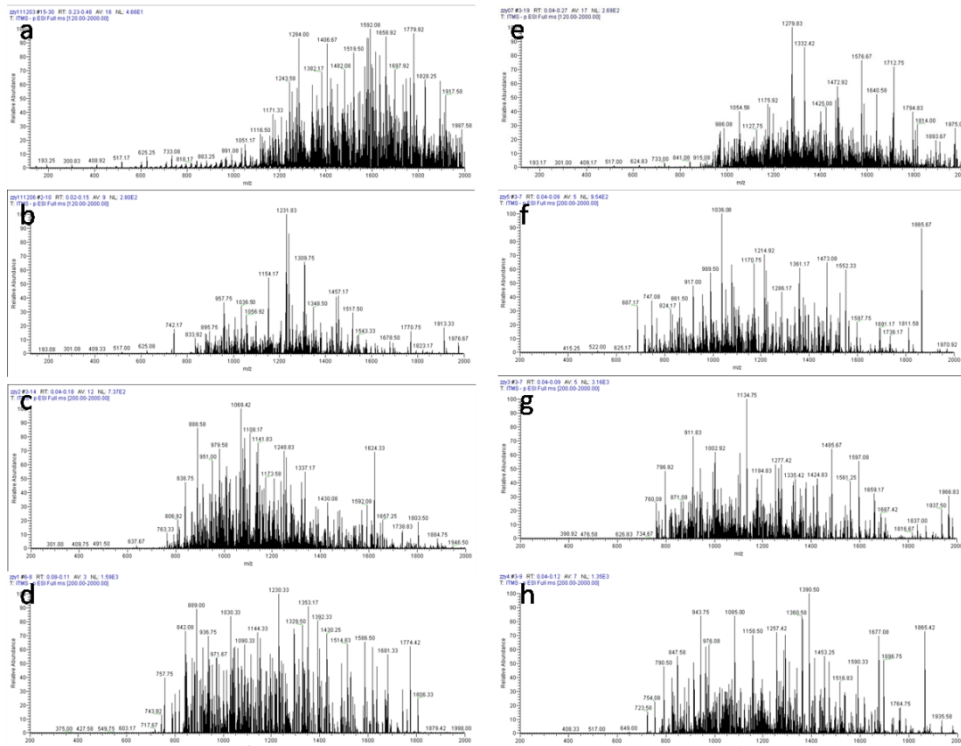

Fig. S4 ESI-MS of solute in supernate from production prepared with 240 mg NaOH a LaF<sub>3</sub>, b CeF<sub>3</sub>, c NaEuF<sub>4</sub>, d NaGdF<sub>4</sub>, e NaTbF<sub>4</sub>, f NaErF<sub>4</sub>, g NaTmF<sub>4</sub>, h NaYbF<sub>4</sub>.

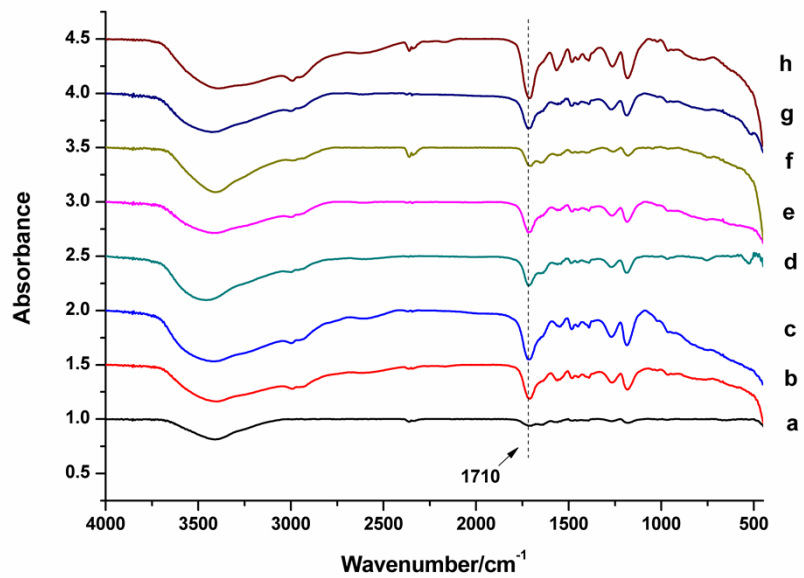

Fig. S5 IR spectra of products prepared in the presence of 240 mg NaOH a LaF<sub>3</sub>, b CeF<sub>3</sub>, c NaEuF<sub>4</sub>, d NaGdF<sub>4</sub>, e NaTbF<sub>4</sub>, f NaErF<sub>4</sub>, g NaTmF<sub>4</sub>, h NaYbF<sub>4</sub>.

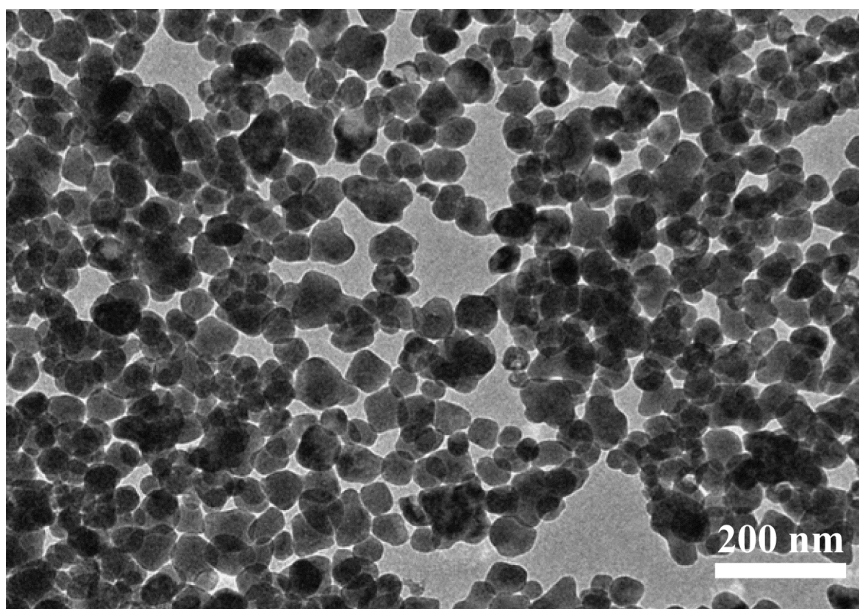

Fig. S6 TEM image of NaYF<sub>4</sub>-CDDP.

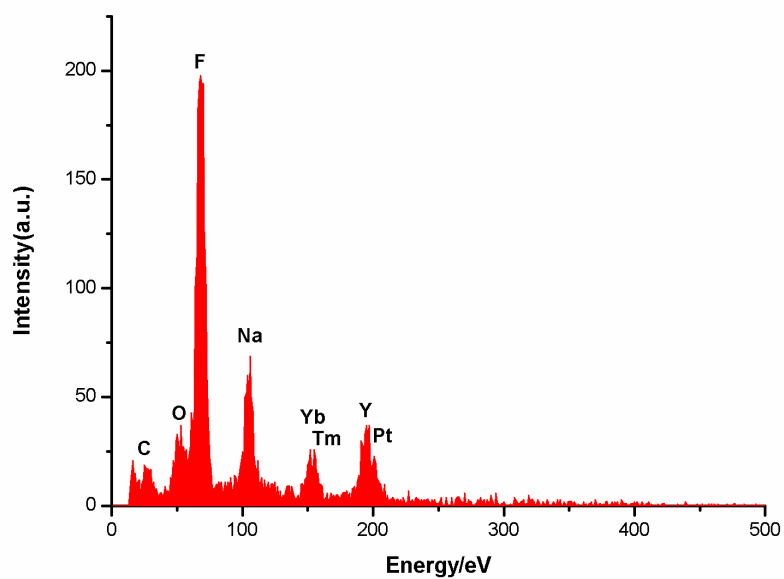

Fig. S7 EDX spectrum of NaYF<sub>4</sub>-CDDP.

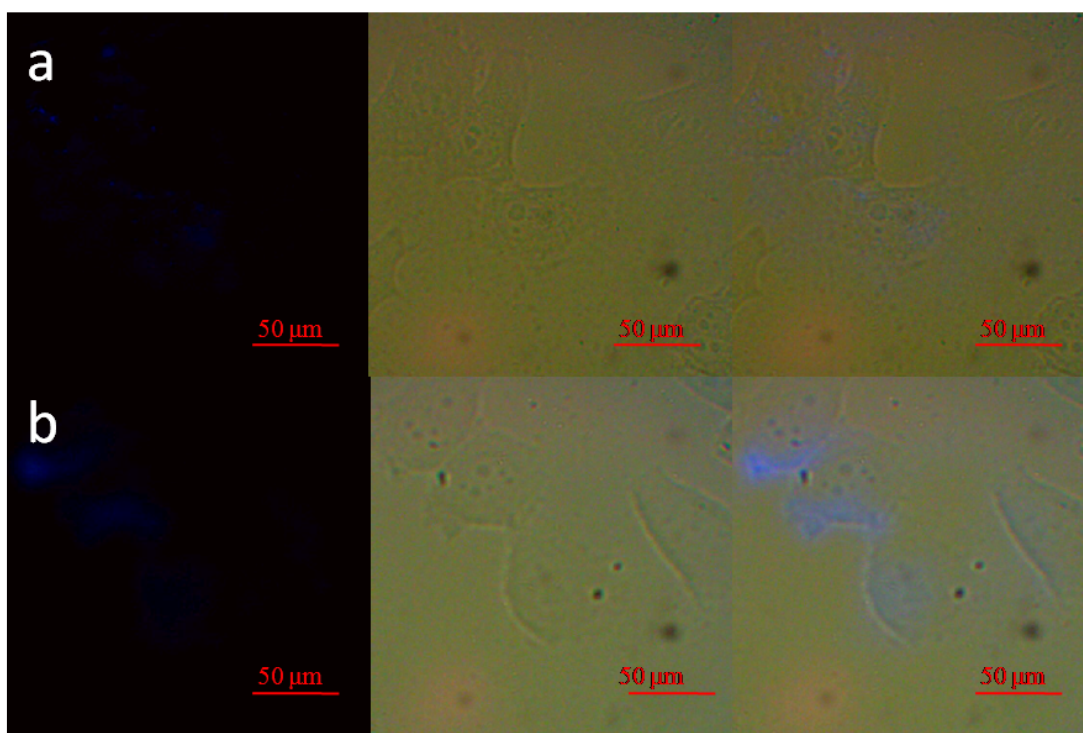

Fig. S8 Upconversion luminescence images of HeLa cells stained with 400 μg/mL NaYF<sub>4</sub>:Yb<sup>3+</sup>/Tm<sup>3+</sup> nanoparticles for (a) 12h, and (b) 24 h on the left, bright field images in the middle, and merged bright field and upconversion luminescence images on the right.
